# Supplementary material for: High-performance dual-ion Zn batteries enabled by a polyzwitterionic hydrogel electrolyte with regulated anion/cation transport and suppressed Zn dendrite growth
Source: Royal Society of Chemistry journal article supplement (doi:10.1039/d1ta08127f), 2021-01-01
Supplement: d1ta08127f1.pdf [file d1ta08127f1.pdf]

## Supporting information

# High-Performance Dual-Ion Zn Batteries Enabled by Polyzwitterionic Hydrogel Electrolyte with Regulated Anion/Cation Transport and Suppressed Zn Dendrite Growth

*Longwei Li<sup>a,b#</sup>, Lanshuang Zhang<sup>a,b#</sup>, Wenbin Guo<sup>a,b</sup>, Caiyun Chang<sup>a,c</sup>, Jing Wang<sup>a,c</sup>, Zifeng Cong<sup>a,b</sup>, Xiong Pu<sup>a,b,c,d\*</sup>*

<sup>a</sup>CAS Center for Excellence in Nanoscience, Beijing Key Laboratory of Micro-Nano Energy and Sensor, Beijing Institute of Nanoenergy and Nanosystems, Chinese Academy of Sciences, Beijing 101400, China

<sup>b</sup>School of Nanoscience and Technology, University of Chinese Academy of Sciences, Beijing 100049, China

<sup>c</sup>Center on Nanoenergy Research, School of Chemistry and Chemical Engineering, School of Physical Science and Technology, Guangxi University, Nanning 530004, China

<sup>d</sup>CUSTech Institute of Technology, Wenzhou, Zhejiang 325024, China

<sup>#</sup>These authors contributed equally.

\*Corresponding author.

Prof. X. Pu. E-mail: [puxiong@binn.cas.cn](mailto:puxiong@binn.cas.cn)

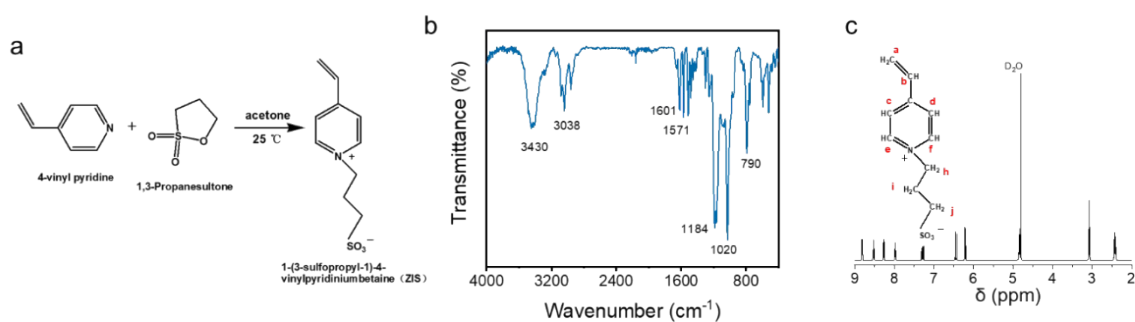

Fig. S1. (a) Synthesis schematic diagram of ZIS. (b) FTIR and (c) <sup>1</sup>H NMR spectra of ZIS.

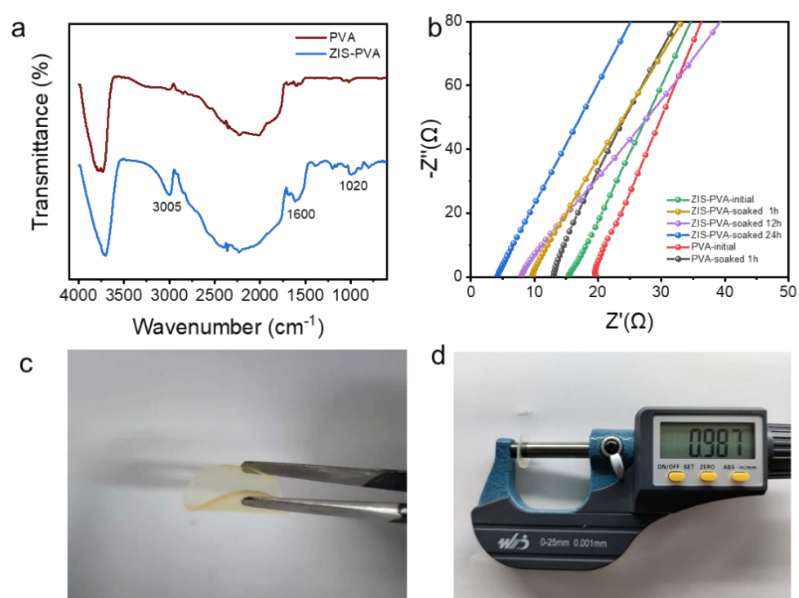

Fig. S2. (a) FTIR spectra of ZIS-PVA and PVA hydrogel. (b) EIS spectras of ZIS-PVA and PVA hydrogel with different soaking time. (c) Digital photos of the ZIS-PVA gel electrolyte used in cell testing. (d) Thickness of the ZIS-PVA hydrogel electrolyte (~1mm).

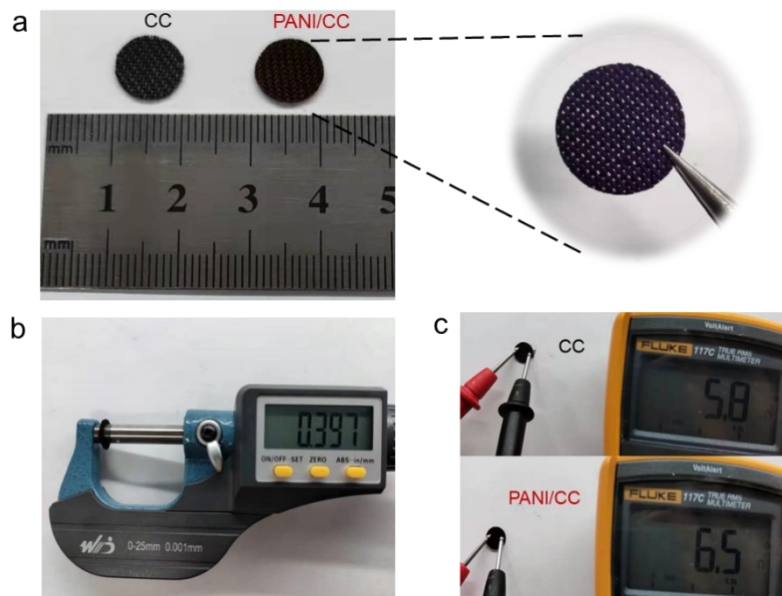

Fig. S3. (a) Optic images of pure CC and PANI/CC. (b) The thickness of PANI/CC cathode was about 0.4 mm. (c) The surface resistance comparison of pure CC and PANI/CC.

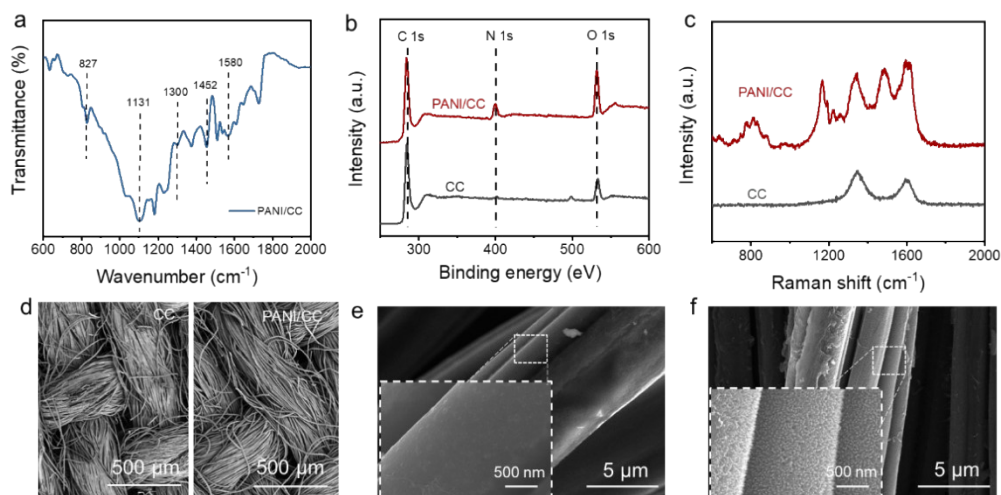

Fig. S4. (a) FTIR, (b) XPS and (c) Raman spectroscopy of pure CC and PANI/CC. (d) SEM images of fiber braided constructions of pure CC and PANI/CC. SEM images showing details on fiber surfaces of (e) pure CC and (f) PANI/CC with larger magnification.

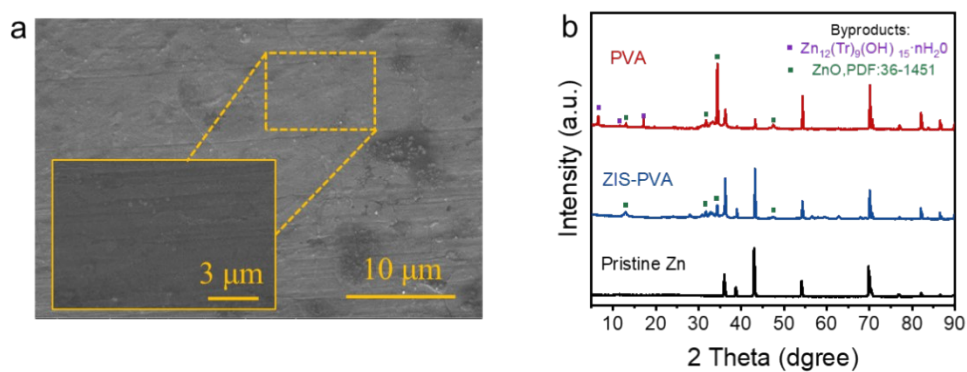

Fig. S5. (a) SEM images of pure Zn foil. (b) XRD patterns of pristine Zn foil and Zn anodes in the Zn/Zn symmetric cells with different electrolytes after 30 cycles at  $2.0 \text{ mAh cm}^{-2}$ .

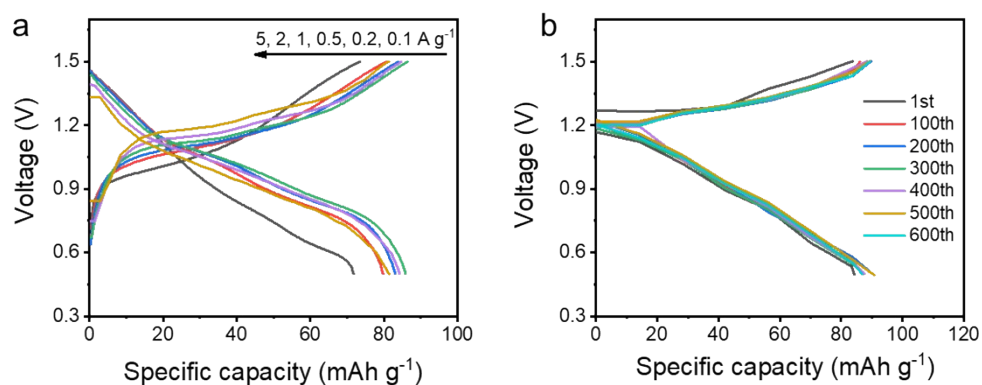

Fig. S6. (a) Discharge-charge curves of Zn/ PVA/PANI cell at different current densities in the range of 0.5 to 1.5 V versus  $\text{Zn}^{2+}/\text{Zn}$ . (b) Voltage/capacity plots of Zn/ PVA/PANI cell at different cycles.

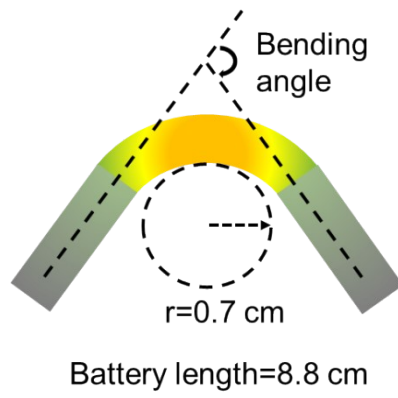

Fig. S7. Flexibility evaluation of Zn/ZIS-PVA/PANI pouch cells.
